# Supplementary material
Source: Springer Nature journal article supplement (https://www.springermedizin.de/resource/supplementary/12943_2013_1250_MOESM1_ESM.pdf/9553056)
Supplement: MOESM1 [file 9553056]

## Additional file 1

Expression levels of DNMT1 in non-mutated and BRCA1-mutated breast cancer and their adjacent normal breast tissues

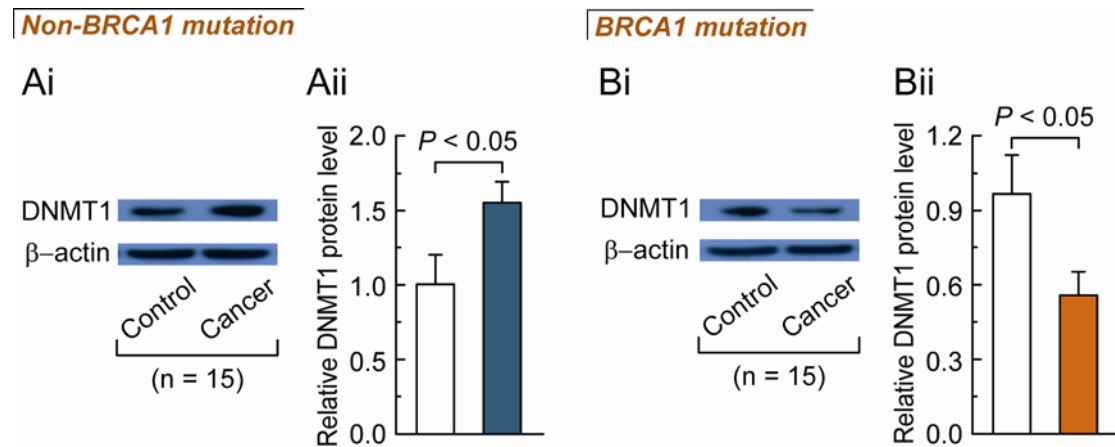

Ai and Bi, western blot analysis of DNMT1 in non-mutated and BRCA1-mutated breast cancer, compared to their adjacent normal tissue, respectively. The blot is representative of three separate experiments (each group, n = 15); Aii and Bii, summary of the results from Ai and Bi, respectively. Bar graphs show mean  $\pm$  SD.
